# Supplementary material for: In silico rational design of ionic liquids for the exfoliation and dispersion of boron nitride nanosheets
Source: Royal Society of Chemistry journal article supplement (doi:10.1039/c5cp05376e), 2015-11-19
Supplement: c5cp05376e1.pdf [file c5cp05376e1.pdf]

***In Silico* Rational Design of Ionic Liquids for Exfoliation and Dispersion of  
Boron Nitride Nanosheets**

Gregorio García,<sup>a</sup> Mert Atilhan,<sup>b</sup> and Santiago Aparicio<sup>a\*</sup>

<sup>a</sup>Department of Chemistry, University of Burgos, 09001 Burgos, Spain

<sup>b</sup>Department of Chemical Engineering, Qatar University, P.O. Box 2713, Doha, Qatar

\*Corresponding author: [sapar@ubu.es](mailto:sapar@ubu.es)

**Electronic Supplementary Information**

## THEORETICAL DETAILS

Firstly, all geometry optimizations were done using  $\omega$ B97XD functional<sup>1</sup> in combination with 6-31G(D) basis set. This functional has been selected based on two characteristics.  $\omega$ B97XD functional is a long range functional that minimize the self-interaction errors (SIE). Common DFT methods generally overestimate charge transfers.<sup>2</sup> SIE is derived from a qualitatively incorrect asymptotic potential description for the exchange correlation functional,<sup>3</sup> which is corrected through the splitting of the Coulomb repulsion energy into long-range and short-range terms.<sup>4</sup> In addition, this functional also includes dispersion corrections according to D2 Grimme's scheme.<sup>5</sup> Both dispersion interactions and charge transfer process could be adequate for a treatment of the study on the interaction between ionic liquids and boron-nitride nanosheets. In addition, calculated energies after dispersion corrections are comparable with more reliable values, such as those obtained at the MP2 level.<sup>6</sup>

Model boron nitride (BN) nanosheets were described to have a 2D honeycomb structure of 121 atoms, which was end-capped with hydrogen atoms. Smaller models have proven to be enough to study the physisorption of IL onto boron-nitride nanosheets.<sup>7</sup> Optimized nanosheet at  $\omega$ B97XD/6-31G(D) was used for further optimizations.

X-nanosheet models (X=cation or anion) were built by (randomly) placing the optimized geometry of X onto the nanosheets. For anions, those anions 1-6 were essayed, the remaining systems were obtained based on the most stable geometry of the corresponding pristine anion. For example, 3g-BN systems was built from 3-BN system. In these starting geometries, cation was placed to allow both alkyl – BN interactions or  $Z^+$  ( $Z=N^+$  for cations I-IV,  $P^+$  for V and  $S^+$  for cation VI), focusing our interest on the most stable configuration. Anions 1-6 were placed to allow a  $\pi$ -stacking between the aromatic motif and the surface with a distance of around 3.5 Å. These starting cation-BN geometries were optimized, keeping constant nanosheet coordinates. Then for each system the most geometry was fully optimized at  $\omega$ B97XD/6-31G(D) theoretical level.

After optimized starting geometries of anion-BN systems (anions 1-6) at  $\omega$ B97XD/6-31G(D), the relative disposition (through longitudinal displacements) over the surface was assessed through single point (SP) calculations. Based on these SPs, anions 1-6 were placed at the most stable disposition on BN nanosheets and the starting geometries for the remaining anions were also built. These anion-BN systems were firstly optimized in two stages: i) fixing BN coordinates; ii) fully optimization from geometries obtained in step i).

IL-BN nanosystems were optimized following a similar procedure than those described for anion-BN systems. In this case, the relative disposition between the IL and the nanosheet through longitudinal displacements was only assed for ILs based on cations IV and VI paired with anions 1g, 2g, 3g, 5g and 6i.

For IL-CO<sub>2</sub> systems, four different initial geometries (regarding to the relative disposition between CO<sub>2</sub> molecule and ionic pair were essayed), focusing our attention on the dispositions with the lowest energy. For (IL-BN)-CO<sub>2</sub> systems, we optimized an initial structure built from optimized geometries of both IL-CO<sub>2</sub> and IL-BN systems.

Based on optimized geometries, single point calculations were carried out at  $\omega$ B97XD/cc-pvDZ theoretical level, and molecular properties (such as binding energies, intermolecular interactions, atomic charge or electronic structure) obtained at this level were further used for the discussion. The Gaussian 09 (Revision D.01) package has been used for all calculations.<sup>8</sup>

Counterpoise procedure was applied to minimized basis sets superposition errors on computed binding energies.<sup>9</sup> Intermolecular interactions were featured through the analysis of the reduced density gradient (RGD) at low densities.<sup>10</sup> The visualization of RGD iso-surfaces for these peaks allows the visualization of weak interactions. The strength and the nature of the interactions is quantified through the sign of the second density Hessian eigenvalue.<sup>10</sup> Both analysis were done using MultiWFN code.<sup>11</sup> Among other available schemes, those based one on wavefuctions (e.g. Mulliken<sup>12</sup>) have been found to be very dependent the selected basis set.<sup>13</sup> Then, we selected alternative definitions of fitting atomic charges to the molecular electrostatic potentials, such as ChelpG<sup>14</sup> methods, which has proven to be suitable for describing atomic charges in ILs,<sup>15</sup> and Hirshfeld scheme which is based on the electronic density.<sup>16</sup> Total and Partial Density of States (DOS and PDOS, respectively) were calculated using GaussSum code.<sup>17</sup>

**Table 1S. Binding Energies for anion-BN interactions ( $\Delta E_{ani-BN}$ ) along to dispersion contribution to the total binding energy ( $\Delta E^D_{ani-BN}$ ) and total charge on boron nitride sheet ( $q^{BN}$ ) according to Mulliken, ChelpG and Hirshfeld populations**

| Anion | $\Delta E_{ani-BN}$<br>/ kcal mol <sup>-1</sup> | $\Delta E^D_{ani-BN}$<br>/ kcal mol <sup>-1</sup> | $q^{BN} / e^-$ |        |           |
|-------|-------------------------------------------------|---------------------------------------------------|----------------|--------|-----------|
|       |                                                 |                                                   | Mulliken       | ChelpG | Hirshfeld |
| 1     | 23.87                                           | 19.68                                             | -0.204         | -0.292 | -0.315    |
| 1a    | 30.91                                           | 32.49                                             | -0.166         | -0.280 | -0.346    |
| 1b    | 32.30                                           | 32.33                                             | -0.169         | -0.290 | -0.360    |
| 1c    | 28.88                                           | 28.08                                             | -0.173         | -0.343 | -0.310    |
| 1d    | 28.81                                           | 27.92                                             | -0.169         | -0.278 | -0.319    |
| 1e    | 29.65                                           | 28.32                                             | -0.171         | -0.286 | -0.332    |
| 1f    | 34.67                                           | 35.37                                             | -0.163         | -0.345 | -0.370    |
| 1g    | 36.86                                           | 36.97                                             | -0.187         | -0.303 | -0.396    |
| 1h    | 35.71                                           | 35.94                                             | -0.177         | -0.295 | -0.388    |
| 1i    | 35.06                                           | 35.88                                             | -0.147         | -0.273 | -0.354    |
| 1j    | 36.85                                           | 37.05                                             | -0.163         | -0.286 | -0.381    |
| 2     | 22.51                                           | 20.86                                             | -0.186         | -0.274 | -0.286    |
| 2a    | 30.61                                           | 33.78                                             | -0.162         | -0.271 | -0.339    |
| 2b    | 33.84                                           | 35.05                                             | -0.208         | -0.299 | -0.398    |
| 2bb   | 31.67                                           | 34.45                                             | -0.178         | -0.293 | -0.351    |
| 2c    | 27.85                                           | 28.89                                             | -0.176         | -0.337 | -0.310    |
| 2d    | 29.33                                           | 29.44                                             | -0.176         | -0.276 | -0.328    |
| 2dd   | 28.34                                           | 29.06                                             | -0.154         | -0.269 | -0.304    |
| 2e    | 29.25                                           | 29.77                                             | -0.166         | -0.277 | -0.316    |
| 2g    | 37.23                                           | 38.67                                             | -0.191         | -0.299 | -0.405    |
| 2h    | 33.55                                           | 36.96                                             | -0.154         | -0.268 | -0.347    |
| 2hh   | 35.44                                           | 38.23                                             | -0.159         | -0.278 | -0.364    |
| 2i    | 37.37                                           | 38.80                                             | -0.194         | -0.292 | -0.400    |
| 2ii   | 35.93                                           | 38.35                                             | -0.167         | -0.280 | -0.370    |
| 2j    | 34.43                                           | 37.11                                             | -0.155         | -0.282 | -0.343    |
| 3     | 25.95                                           | 23.29                                             | -0.176         | -0.349 | -0.288    |
| 3a    | 31.10                                           | 32.87                                             | -0.167         | -0.367 | -0.349    |
| 3b    | 30.41                                           | 33.53                                             | -0.189         | -0.363 | -0.317    |
| 3c    | 30.45                                           | 31.00                                             | -0.163         | -0.333 | -0.303    |
| 3d    | 29.52                                           | 30.89                                             | -0.148         | -0.356 | -0.306    |
| 3e    | 30.74                                           | 30.89                                             | -0.159         | -0.375 | -0.321    |
| 3f    | 36.34                                           | 38.84                                             | -0.156         | -0.391 | -0.359    |
| 3g    | 36.98                                           | 39.10                                             | -0.152         | -0.376 | -0.366    |
| 3h    | 34.32                                           | 36.14                                             | -0.153         | -0.324 | -0.355    |
| 3i    | 34.62                                           | 35.96                                             | -0.157         | -0.328 | -0.365    |
| 3j    | 34.35                                           | 35.92                                             | -0.146         | -0.345 | -0.359    |
| 4     | 21.23                                           | 19.05                                             | -0.181         | -0.265 | -0.278    |
| 4b    | 32.21                                           | 31.69                                             | -0.169         | -0.277 | -0.349    |
| 4c    | 27.88                                           | 27.67                                             | -0.170         | -0.325 | -0.300    |
| 4e    | 28.14                                           | 27.59                                             | -0.170         | -0.274 | -0.322    |
| 4f    | 33.33                                           | 34.45                                             | -0.164         | -0.334 | -0.364    |
| 4g    | 34.46                                           | 35.87                                             | -0.178         | -0.280 | -0.375    |
| 5     | 22.25                                           | 20.57                                             | -0.178         | -0.338 | -0.262    |
| 5a    | 29.88                                           | 33.38                                             | -0.167         | -0.339 | -0.323    |
| 5b    | 31.17                                           | 34.40                                             | -0.195         | -0.348 | -0.338    |
| 5c    | 27.24                                           | 29.41                                             | -0.171         | -0.369 | -0.282    |
| 5d    | 28.53                                           | 28.75                                             | -0.174         | -0.342 | -0.307    |
| 5e    | 28.59                                           | 28.91                                             | -0.170         | -0.352 | -0.312    |
| 5f    | 34.93                                           | 38.03                                             | -0.180         | -0.376 | -0.366    |
| 5g    | 34.94                                           | 37.67                                             | -0.184         | -0.360 | -0.364    |
| 5h    | 33.00                                           | 36.08                                             | -0.153         | -0.333 | -0.331    |
| 5i    | 33.85                                           | 36.46                                             | -0.161         | -0.334 | -0.337    |
| 5j    | 35.51                                           | 38.08                                             | -0.183         | -0.362 | -0.377    |
| 6     | 17.83                                           | 10.82                                             | -0.174         | -0.279 | -0.271    |
| 6a    | 27.87                                           | 24.77                                             | -0.168         | -0.288 | -0.339    |
| 6d    | 22.84                                           | 19.61                                             | -0.152         | -0.271 | -0.291    |
| 6h    | 29.21                                           | 28.25                                             | -0.148         | -0.278 | -0.333    |
| 6i    | 30.11                                           | 28.31                                             | -0.150         | -0.283 | -0.342    |

**Table 2S. Binding Energies for cation-BN interactions ( $\Delta E_{cat-BN}$ ) along to dispersion contribution to the total binding energy ( $\Delta E^D_{cat-BN}$ ) and total charge on boron nitride sheet ( $q^{BN}$ ) according to Mulliken, ChelpG and Hirshfeld populations**

| Cation | $\Delta E_{cat-BN}$<br>/ kcal mol <sup>-1</sup> | $\Delta E^D_{cat-BN}$<br>/ kcal mol <sup>-1</sup> | $q^{BN} / e^-$ |        |           |
|--------|-------------------------------------------------|---------------------------------------------------|----------------|--------|-----------|
|        |                                                 |                                                   | Mulliken       | ChelpG | Hirshfeld |
| I      | 27.09                                           | 16.11                                             | 0.122          | 0.378  | 0.107     |
| II     | 24.84                                           | 17.27                                             | 0.115          | 0.374  | 0.113     |
| III    | 24.49                                           | 18.25                                             | 0.128          | 0.344  | 0.084     |
| IV     | 22.77                                           | 13.07                                             | 0.018          | 0.298  | 0.059     |
| V      | 24.92                                           | 19.18                                             | 0.126          | 0.346  | 0.100     |
| VI     | 22.58                                           | 16.32                                             | 0.119          | 0.343  | 0.082     |

**Table 3S. Melting points,  $T_m$ , of selected ionic liquids calculated according to the method proposed by Preiss et al.<sup>18</sup>**

| anion | cation                       |                              |
|-------|------------------------------|------------------------------|
|       | IV<br>$T_m / ^\circ\text{C}$ | VI<br>$T_m / ^\circ\text{C}$ |
| 1f    | 58.9                         | 19.3                         |
| 1g    | 61.0                         | 21.1                         |
| 1h    | 64.3                         | 23.7                         |
| 1i    | 61.8                         | 21.7                         |
| 1j    | 58.9                         | 19.3                         |
| 2g    | 66.1                         | 25.2                         |
| 2hh   | 68.2                         | 26.9                         |
| 2i    | 66.8                         | 25.8                         |
| 2ii   | 68.9                         | 27.5                         |
| 2j    | 63.5                         | 22.3                         |
| 3f    | 63.9                         | 21.2                         |
| 3g    | 79.7                         | 38.8                         |
| 3h    | 67.7                         | 28.7                         |
| 3i    | 77.1                         | 27.5                         |
| 3j    | 72.2                         | 23.6                         |
| 5f    | 56.7                         | 19.5                         |
| 5g    | 60.2                         | 22.4                         |
| 5j    | 57.8                         | 20.4                         |
| 6i    | 17.8                         | -19.5                        |

**Table 4S. Binding Energies for IL-BN interactions ( $\Delta E_{IL-BN}$ ) along to dispersion contribution to the total binding energy ( $\Delta E^D_{IL-BN}$ ) and total charge on boron nitride sheet ( $q^{BN}$ ) and both ions according to Mulliken, ChelpG and Hirshfeld populations**

| IL    | $\Delta E_{ani-BN}$<br>/ kcal mol <sup>-1</sup> | $\Delta E^D_{ani-BN}$<br>/ kcal mol <sup>-1</sup> | $q^{BN} / e^-$ |        |           |
|-------|-------------------------------------------------|---------------------------------------------------|----------------|--------|-----------|
|       |                                                 |                                                   | Mulliken       | ChelpG | Hirshfeld |
| IV1f  | 37.70                                           | 44.58                                             | -0.098         | -0.081 | -0.259    |
| IV1g  | 40.40                                           | 46.43                                             | -0.109         | -0.044 | -0.254    |
| IV1h  | 38.46                                           | 45.48                                             | -0.107         | -0.052 | -0.258    |
| IV1i  | 38.24                                           | 45.47                                             | -0.107         | -0.053 | -0.255    |
| IV1j  | 40.96                                           | 46.63                                             | -0.102         | -0.046 | -0.257    |
| IV2g  | 42.02                                           | 47.96                                             | -0.121         | -0.053 | -0.283    |
| IV2hh | 39.89                                           | 46.66                                             | -0.125         | -0.056 | -0.276    |
| IV2i  | 40.18                                           | 46.68                                             | -0.124         | -0.051 | -0.276    |
| IV2ii | 40.60                                           | 46.84                                             | -0.121         | -0.051 | -0.268    |
| IV2j  | 41.67                                           | 47.73                                             | -0.148         | -0.058 | -0.294    |
| IV3f  | 31.94                                           | 38.28                                             | 0.005          | -0.076 | -0.191    |
| IV3g  | 42.04                                           | 49.88                                             | -0.119         | -0.110 | -0.288    |
| IV3h  | 38.56                                           | 46.35                                             | -0.122         | -0.088 | -0.293    |
| IV3i  | 35.73                                           | 43.42                                             | -0.101         | -0.074 | -0.273    |
| IV3j  | 36.41                                           | 44.56                                             | -0.057         | -0.036 | -0.208    |
| IV5f  | 41.36                                           | 47.96                                             | -0.137         | -0.119 | -0.291    |
| IV5g  | 41.52                                           | 45.89                                             | -0.088         | -0.043 | -0.230    |
| IV5j  | 41.39                                           | 45.84                                             | -0.089         | -0.045 | -0.229    |
| IV6i  | 34.40                                           | 38.03                                             | -0.112         | -0.043 | -0.242    |
| VI1f  | 30.29                                           | 35.55                                             | -0.061         | -0.100 | -0.269    |
| VI1g  | 39.78                                           | 48.48                                             | -0.022         | -0.036 | -0.251    |
| VI1h  | 36.68                                           | 45.66                                             | -0.034         | -0.060 | -0.250    |
| VI1i  | 36.01                                           | 45.50                                             | -0.036         | -0.067 | -0.230    |
| VI1j  | 37.52                                           | 47.05                                             | -0.033         | -0.055 | -0.227    |
| VI2g  | 40.65                                           | 49.94                                             | -0.039         | -0.034 | -0.261    |
| VI2hh | 39.63                                           | 49.87                                             | -0.050         | -0.076 | -0.250    |
| VI2i  | 37.69                                           | 51.65                                             | -0.096         | -0.066 | -0.262    |
| VI2ii | 40.76                                           | 50.95                                             | -0.097         | -0.090 | -0.275    |
| VI2j  | 43.17                                           | 49.69                                             | -0.030         | -0.042 | -0.240    |
| VI3f  | 40.51                                           | 46.87                                             | -0.041         | -0.088 | -0.236    |
| VI3g  | 39.54                                           | 44.80                                             | -0.067         | -0.133 | -0.271    |
| VI3h  | 39.48                                           | 46.50                                             | -0.027         | -0.055 | -0.251    |
| VI3i  | 36.79                                           | 45.23                                             | -0.065         | -0.096 | -0.269    |
| VI3j  | 40.56                                           | 48.27                                             | -0.046         | -0.096 | -0.264    |
| VI5f  | 41.54                                           | 49.92                                             | -0.012         | -0.052 | -0.219    |
| VI5g  | 29.86                                           | 37.15                                             | -0.106         | -0.107 | -0.185    |
| VI5j  | 38.51                                           | 45.91                                             | -0.072         | -0.109 | -0.255    |
| VI6i  | 35.76                                           | 41.91                                             | -0.036         | -0.058 | -0.259    |

**Table 5S. Binding Energies for cation-anion interactions ( $\Delta E_{IP}$ ) along to dispersion contribution to the total binding energy ( $\Delta E_{IP}^D$ ) and total charge on the cation ( $q^+$ ) and anion ( $q^-$ ) according to Mulliken, ChelpG and Hirshfeld populations for isolated ionic liquids as well as ionic liquids adsorbed onto the surface of BN**

| IL    | Isolated Ionic Liquids                      |                                               |             |        |           | Adsorbed Ionic Liquids                      |                                               |             |        |           |             |        |           |
|-------|---------------------------------------------|-----------------------------------------------|-------------|--------|-----------|---------------------------------------------|-----------------------------------------------|-------------|--------|-----------|-------------|--------|-----------|
|       | $\Delta E_{IP}$<br>/ kcal mol <sup>-1</sup> | $\Delta E_{IP}^D$<br>/ kcal mol <sup>-1</sup> | $q^+ / e^-$ |        |           | $\Delta E_{IP}$<br>/ kcal mol <sup>-1</sup> | $\Delta E_{IP}^D$<br>/ kcal mol <sup>-1</sup> | $q^+ / e^-$ |        |           | $q^- / e^-$ |        |           |
|       |                                             |                                               | Mulliken    | ChelpG | Hirshfeld |                                             |                                               | Mulliken    | ChelpG | Hirshfeld | Mulliken    | ChelpG | Hirshfeld |
| IV1f  | 115.15                                      | 2.22                                          | 0.654       | 0.784  | 0.532     | 113.46                                      | 2.22                                          | 0.737       | 0.639  | 0.581     | -0.639      | -0.558 | -0.322    |
| IV1g  | 116.31                                      | 2.04                                          | 0.651       | 0.799  | 0.527     | 115.62                                      | 2.01                                          | 0.718       | 0.699  | 0.572     | -0.609      | -0.655 | -0.318    |
| IV1h  | 117.96                                      | 1.69                                          | 0.645       | 0.785  | 0.522     | 117.19                                      | 1.68                                          | 0.723       | 0.724  | 0.574     | -0.616      | -0.672 | -0.316    |
| IV1i  | 118.24                                      | 1.90                                          | 0.645       | 0.791  | 0.522     | 117.45                                      | 1.87                                          | 0.719       | 0.734  | 0.570     | -0.612      | -0.681 | -0.315    |
| IV1j  | 116.01                                      | 2.06                                          | 0.651       | 0.788  | 0.528     | 115.62                                      | 2.00                                          | 0.719       | 0.700  | 0.575     | -0.617      | -0.654 | -0.318    |
| IV2g  | 103.55                                      | 2.17                                          | 0.685       | 0.837  | 0.561     | 102.67                                      | 2.15                                          | 0.747       | 0.683  | 0.601     | -0.626      | -0.630 | -0.318    |
| IV2hh | 102.44                                      | 2.07                                          | 0.676       | 0.808  | 0.553     | 101.74                                      | 2.05                                          | 0.750       | 0.731  | 0.600     | -0.625      | -0.675 | -0.324    |
| IV2ii | 107.42                                      | 2.01                                          | 0.682       | 0.822  | 0.561     | 106.68                                      | 1.98                                          | 0.753       | 0.751  | 0.609     | -0.629      | -0.700 | -0.333    |
| IV2i  | 106.15                                      | 2.00                                          | 0.686       | 0.820  | 0.565     | 105.37                                      | 1.99                                          | 0.751       | 0.737  | 0.605     | -0.630      | -0.686 | -0.337    |
| IV2j  | 102.33                                      | 2.21                                          | 0.687       | 0.827  | 0.564     | 101.77                                      | 2.18                                          | 0.768       | 0.702  | 0.619     | -0.620      | -0.644 | -0.325    |
| IV3f  | 106.06                                      | 9.28                                          | 0.754       | 0.731  | 0.609     | 105.79                                      | 9.25                                          | 0.766       | 0.659  | 0.615     | -0.771      | -0.583 | -0.424    |
| IV3g  | 105.38                                      | 2.24                                          | 0.723       | 0.845  | 0.613     | 102.50                                      | 2.24                                          | 0.780       | 0.692  | 0.658     | -0.661      | -0.582 | -0.370    |
| IV3h  | 105.49                                      | 2.08                                          | 0.721       | 0.847  | 0.611     | 103.28                                      | 2.15                                          | 0.782       | 0.726  | 0.662     | -0.660      | -0.638 | -0.369    |
| IV3i  | 105.86                                      | 2.08                                          | 0.721       | 0.844  | 0.611     | 103.44                                      | 2.31                                          | 0.765       | 0.714  | 0.639     | -0.664      | -0.640 | -0.366    |
| IV3j  | 105.25                                      | 2.49                                          | 0.722       | 0.863  | 0.610     | 102.58                                      | 3.65                                          | 0.760       | 0.696  | 0.613     | -0.703      | -0.660 | -0.405    |
| IV5f  | 94.34                                       | 3.23                                          | 0.792       | 0.898  | 0.700     | 92.05                                       | 2.84                                          | 0.837       | 0.615  | 0.719     | -0.700      | -0.496 | -0.428    |
| IV5g  | 96.16                                       | 3.09                                          | 0.786       | 0.894  | 0.694     | 95.25                                       | 3.08                                          | 0.785       | 0.788  | 0.667     | -0.697      | -0.745 | -0.437    |
| IV5j  | 95.97                                       | 3.12                                          | 0.787       | 0.896  | 0.695     | 95.14                                       | 3.05                                          | 0.788       | 0.783  | 0.669     | -0.699      | -0.738 | -0.440    |
| IV6i  | 109.02                                      | 2.15                                          | 0.653       | 0.541  | 0.550     | 108.29                                      | 2.13                                          | 0.739       | 0.505  | 0.612     | -0.627      | -0.462 | -0.370    |
| VI1f  | 90.56                                       | 7.69                                          | 0.790       | 0.728  | 0.703     | 90.29                                       | 7.42                                          | 0.804       | 0.596  | 0.716     | -0.743      | -0.496 | -0.447    |
| VI1g  | 96.39                                       | 2.41                                          | 0.719       | 0.723  | 0.637     | 93.33                                       | 2.02                                          | 0.718       | 0.613  | 0.683     | -0.696      | -0.577 | -0.432    |
| VI1h  | 95.58                                       | 2.28                                          | 0.718       | 0.728  | 0.640     | 92.63                                       | 2.18                                          | 0.728       | 0.663  | 0.676     | -0.694      | -0.603 | -0.426    |
| VI1i  | 97.32                                       | 2.21                                          | 0.712       | 0.725  | 0.631     | 94.34                                       | 2.07                                          | 0.725       | 0.649  | 0.659     | -0.689      | -0.582 | -0.429    |
| VI1j  | 96.08                                       | 2.40                                          | 0.718       | 0.719  | 0.636     | 93.83                                       | 2.56                                          | 0.730       | 0.640  | 0.669     | -0.697      | -0.585 | -0.442    |
| VI2g  | 85.44                                       | 2.56                                          | 0.747       | 0.733  | 0.665     | 82.11                                       | 2.33                                          | 0.744       | 0.633  | 0.713     | -0.705      | -0.599 | -0.452    |
| VI2hh | 83.37                                       | 2.41                                          | 0.744       | 0.741  | 0.664     | 80.59                                       | 3.42                                          | 0.770       | 0.729  | 0.699     | -0.720      | -0.653 | -0.449    |
| VI2ii | 88.58                                       | 2.32                                          | 0.748       | 0.744  | 0.667     | 80.02                                       | 2.84                                          | 0.802       | 0.628  | 0.751     | -0.706      | -0.562 | -0.489    |
| VI2i  | 87.44                                       | 2.34                                          | 0.753       | 0.755  | 0.676     | 85.50                                       | 2.88                                          | 0.786       | 0.765  | 0.688     | -0.689      | -0.675 | -0.413    |
| VI2j  | 82.96                                       | 2.88                                          | 0.757       | 0.725  | 0.677     | 81.40                                       | 2.56                                          | 0.762       | 0.651  | 0.715     | -0.732      | -0.609 | -0.475    |
| VI3f  | 88.41                                       | 4.40                                          | 0.789       | 0.806  | 0.711     | 88.06                                       | 4.62                                          | 0.745       | 0.716  | 0.686     | -0.704      | -0.628 | -0.450    |
| VI3g  | 95.68                                       | 5.16                                          | 0.735       | 0.803  | 0.662     | 65.06                                       | 3.73                                          | 0.866       | 0.823  | 0.846     | -0.799      | -0.690 | -0.575    |
| VI3h  | 89.25                                       | 2.78                                          | 0.760       | 0.825  | 0.707     | 87.97                                       | 2.87                                          | 0.723       | 0.719  | 0.703     | -0.696      | -0.664 | -0.452    |
| VI3i  | 89.55                                       | 3.36                                          | 0.757       | 0.754  | 0.690     | 87.44                                       | 2.49                                          | 0.772       | 0.794  | 0.734     | -0.707      | -0.698 | -0.465    |
| VI3j  | 91.31                                       | 4.50                                          | 0.756       | 0.847  | 0.679     | 90.25                                       | 4.78                                          | 0.753       | 0.695  | 0.713     | -0.707      | -0.599 | -0.449    |
| VI5f  | 81.95                                       | 3.51                                          | 0.803       | 0.873  | 0.762     | 79.10                                       | 3.54                                          | 0.743       | 0.634  | 0.747     | -0.731      | -0.582 | -0.528    |
| VI5g  | 86.10                                       | 9.44                                          | 0.784       | 0.748  | 0.712     | 75.00                                       | 4.59                                          | 0.827       | 0.804  | 0.756     | -0.721      | -0.697 | -0.571    |
| VI5j  | 88.79                                       | 11.78                                         | 0.819       | 0.715  | 0.696     | 80.81                                       | 5.48                                          | 0.810       | 0.673  | 0.759     | -0.738      | -0.564 | -0.504    |
| VI6i  | 89.81                                       | 2.81                                          | 0.729       | 0.560  | 0.640     | 88.78                                       | 2.61                                          | 0.745       | 0.518  | 0.719     | -0.709      | -0.460 | -0.460    |

<sup>a</sup> For isolated ionic liquids,  $q^- = -q^+$ .

**Table 6S. Binding Energies related to CO<sub>2</sub> capture by ILs IV2j, IV3g, IV3h and IV5f ( $\Delta E_{IL-CO_2}$ ) along optimized molecular geometries**

| Ionic Liquid | Conformer | $\Delta E_{IL-CO_2}$ / kcal mol <sup>-1</sup> | Optimized Geometry                                                                   |
|--------------|-----------|-----------------------------------------------|--------------------------------------------------------------------------------------|
| IV2j         | c3        | 3.27                                          | 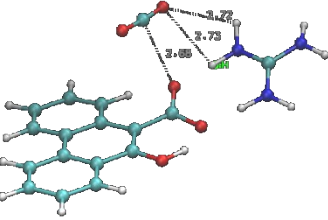   |
|              | c4        | 2.98                                          |    |
| IV3g         | c1        | 4.47                                          |    |
|              | c2        | 5.08                                          |  |
| IV3h         | c2        | 5.00                                          |  |
| IV5f         | c1        | 4.52                                          |  |



|  |    |      |                                                                                    |
|--|----|------|------------------------------------------------------------------------------------|
|  | c2 | 5.10 | 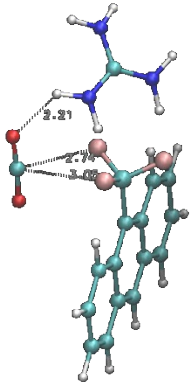 |
|--|----|------|------------------------------------------------------------------------------------|

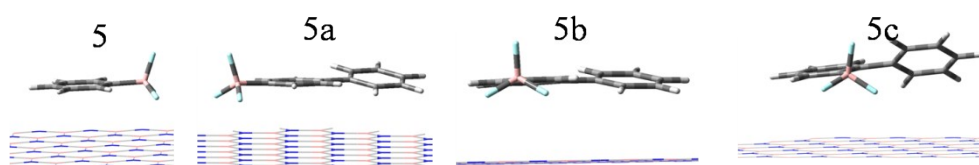

**Figure 1S.** Optimized structure of anion-BN systems, anion=5, 5a, 5b and 5c.

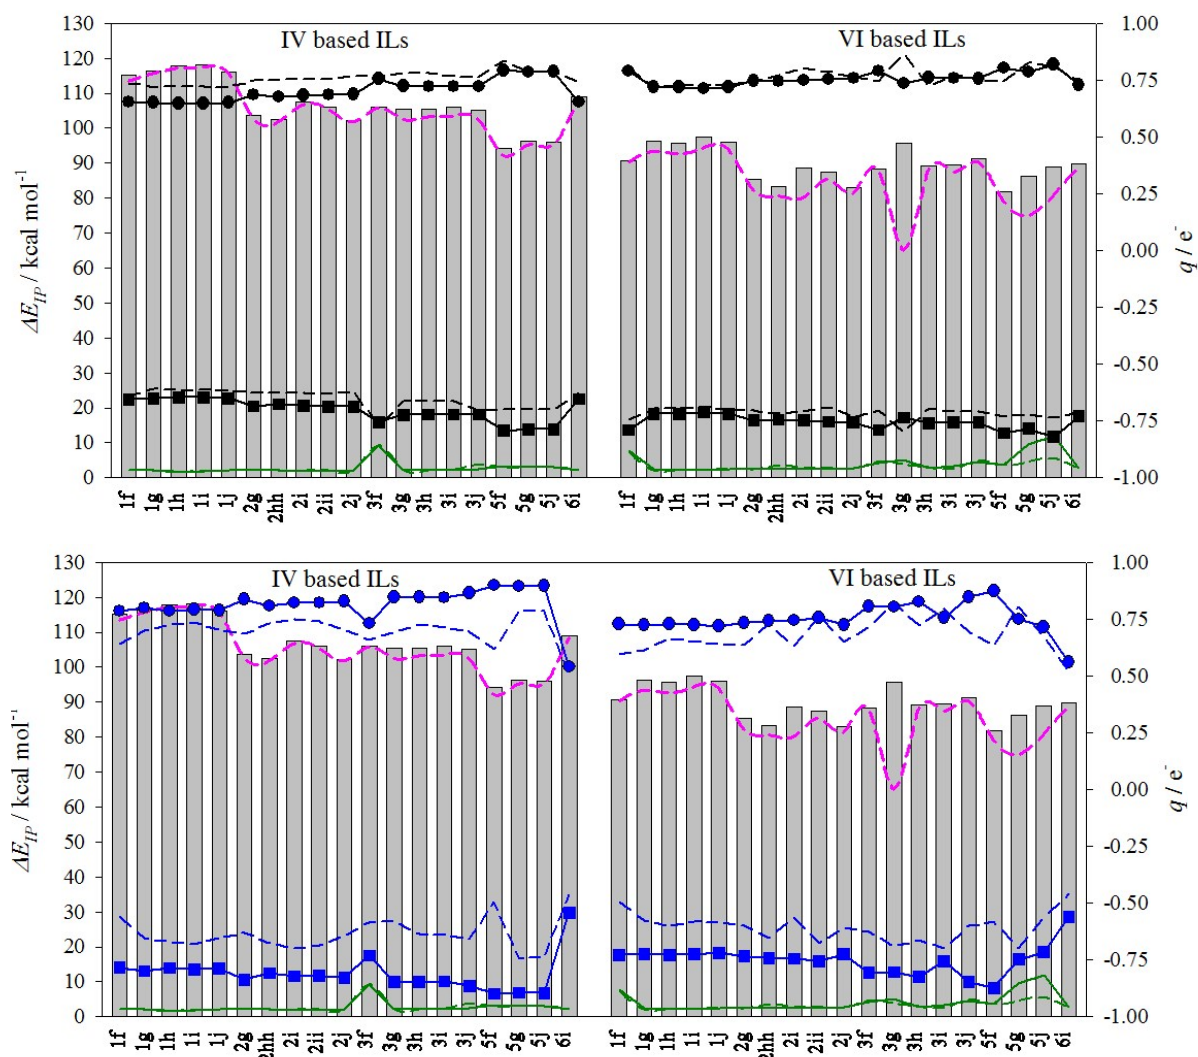

**Figure 2S.** Binding energies for cation-anion interactions ( $\Delta E_{IL}$ , grey bars and grey dotted lines for isolated IL and IL on the surface of BN, respectively) along to dispersion contribution to the total binding energy ( $\Delta E^D_{IL}$ , solid and dotted green lines for isolated IL and IL on the surface of BN, respectively) and total charge on the cation ( $q^+$ , circles) and anion ( $q^-$ , squares) according to (up) Mulliken and (bottom) ChelpG populations for isolated ionic liquids (solid lines) as well as ionic liquids adsorbed onto the surface of BN (dotted lines). Data for this Figure are in Table 4S.

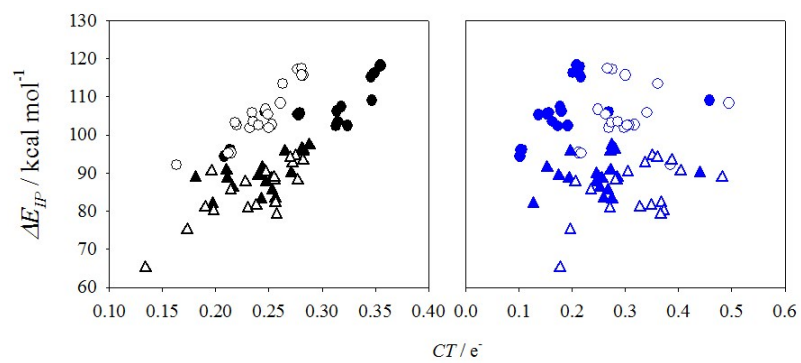

**Figure 3S.** Evolution of binding energies ( $\Delta E_{IP}$ ) for the interaction between ions as a function of the charge transfer (CT) according to Mulliken (black) and ChelpG (blue) populations. Circles / triangles correspond to IV / VI cation based ionic liquids, while filled /empty symbols stand for isolated / adsorbed ionic pairs.

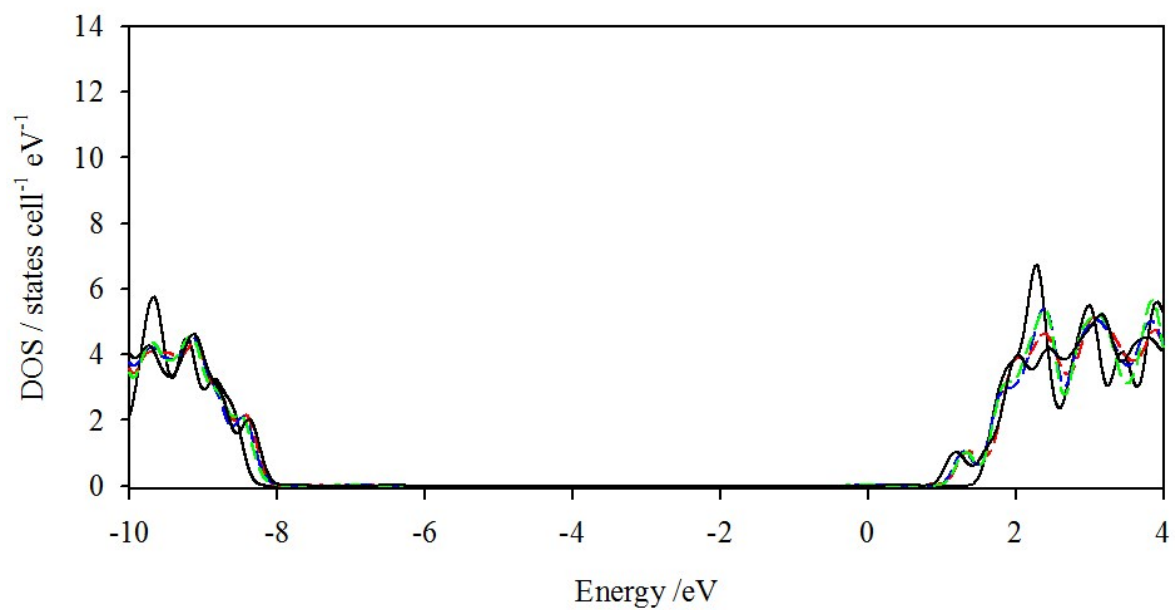

**Figure 4S.** DOS of Pristine boron-nitride nanosheet (black solid line) along to PDOS corresponding to nanosheet atoms (dotted lines) for IV2j-BN (red), IV3g-BN (blue), IV3g-BN (green) and IV5f-BN (pink) systems.

## REFERENCES

1. J.-D. Chai, M. Head-Gordon, *Phys. Chem. Chem. Phys.*, 2008, **10**, 6615-6620.
2. T. Bally, G. N. Sastry, *J. Phys. Chem. A*, 1997, **101**, 7923-7925; O. V. Gritsenko, B. Ensing, P. R. T. Schipper, E. J. Baerends, *J. Phys. Chem. A*, 2000, **104**, 8558-8565.
3. A. J. Cohen, P. Mori-Sánchez, W. Yang, *Chem. Rev.*, 2012, **112**, 289-320.
4. T. Tsuneda, K. Hirao, *Wiley Interdisciplinary Reviews: Computational Molecular Science*, 2014, **4**, 375-390.
5. S. Grimme, *J. Comput. Chem.*, 2006, **27**, 1787-1799.
6. T. Schwabe, S. Grimme, *Phys. Chem. Chem. Phys.*, 2007, **9**, 3397-3406.
7. M. Shakourian-Fard, G. Kamath, Z. Jamshidi, *J. Phys. Chem. C*, 2014, **118**, 26003-26016.
8. M. J. Frisch, G. W. Trucks, H. B. Schlegel, G. E. Scuseria, M. A. Robb, J. R. Cheeseman, G. Scalmani, V. Barone, B. Mennucci, G. A. Petersson, H. Nakatsuji, M. Caricato, X. Li, H. P. Hratchian, A. F. Izmaylov, J. Bloino, G. Zheng, J. L. Sonnenberg, M. Hada, M. Ehara, K. Toyota, R. Fukuda, J. Hasegawa, M. Ishida, T. Nakajima, Y. Honda, O. Kitao, H. Nakai, T. Vreven, J. A. Montgomery, Jr., J. E. Peralta, F. Ogliaro, M. Bearpark, J. J. Heyd, E. Brothers, K. N. Kudin, V. N. Staroverov, R. Kobayashi, J. Normand, K. Raghavachari, A. Rendell, J. C. Burant, S. S. Iyengar, J. Tomasi, M. Cossi, N. Rega, J. M. Millam, M. Klene, J. E. Knox, J. B. Cross, V. Bakken, C. Adamo, J. Jaramillo, R. Gomperts, R. E. Stratmann, O. Yazyev, A. J. Austin, R. Cammi, C. Pomelli, J. W. Ochterski, R. L. Martin, K. Morokuma, V. G. Zakrzewski, G. A. Voth, P. Salvador, J. J. Dannenberg, S. Dapprich, A. D. Daniels, Ö. Farkas, J. B. Foresman, J. V. Ortiz, J. Cioslowski, and D. J. Fox, *Gaussian 09, Revision D.01*, Gaussian, Inc.: Wallingford, CT, USA, 2009.
9. S. F. Boys, F. Bernardi, *Molecular Physics*, 1970, **19**, 553-566.
10. E. R. Johnson, S. Keinan, P. Mori-Sánchez, J. Contreras-García, A. J. Cohen, W. Yang, *J. Am. Chem. Soc.*, 2010, **132**, 6498-6506.
11. T. Lu, F. Chen, *J. Comput. Chem.*, 2012, **33**, 580-592.
12. R. S. Mulliken, *J. Chem. Phys.*, 1955, **23**, 1833.
13. J. J. Philips, M. A. Hudspeth, P. M. Browne Jr, J. E. Peralta, *Chemical Physics Letters*, 2010, **495**, 146-150.
14. C. M. Breneman, K. B. Wiberg, *J. Comput. Chem.*, 1990, **11**, 361-373.
15. S. Aparicio, M. Atilhan, *Chemical Physics*, 2012, **400**, 118-125; S. Aparicio, M. Atilhan, *Energy Fuels*, 2013, **27**, 2515-2527; V. Sanz, R. Alcalde, M. Atilhan, S. Aparicio, *J. Mol. Model.*, 2014, **20**, 1-14; S. Aparicio, M. Atilhan, *J. Chem. Phys. B*, 2012, **116**, 9171-9185; S. Aparicio, M. Atilhan, *Energy Fuels*, 2010, **24**, 4989-5001.
16. F. L. Hirshfeld, *Theoret. Chim. Acta*, 1977, **44**, 129-138.
17. N. M. O'Boyle, A. L. Tenderholt, K. M. Langner, *J. Comput. Chem.*, 2008, **29**, 839-845.
18. U. Preiss, S. Bulut, I. Krossing, *J. Phys. Chem. B* 2010, **114**, 11133-11140.
